# Supplementary material for: Berberine Ameliorates Dextran Sulfate Sodium-Induced Ulcerative Colitis and Inhibits the Secretion of Gut Lysozyme via Promoting Autophagy
Source: MDPI journal article supplement (doi:10.3390/metabo12080676), 2022-07-23
Supplement: s1 [file s1]

**Table S1: Animal disease activity index (DAI) score sheet.**

| Percentage of weight loss |   | Stool shape  |   | Stool bleeding |   |
|---------------------------|---|--------------|---|----------------|---|
| Unchanged weight          | 0 | Normal       | 0 | Normal         | 0 |
| 1-5%                      | 1 | Loose stool  | 2 | Occult blood   | 2 |
| 5-10%                     | 2 | Watery stool | 4 | Overt bleeding | 4 |
| 10-15%                    | 3 |              |   |                |   |
| >15%                      | 4 |              |   |                |   |

**Table S2: Mouse colon tissue injury score sheet.**

| Histological changes in colon                                                                                                                                        | Score |
|----------------------------------------------------------------------------------------------------------------------------------------------------------------------|-------|
| Normal histology                                                                                                                                                     | 0     |
| Histological damage is limited to endothelial cells, mild inflammatory cell infiltration                                                                             | 1     |
| Focal ulcer changes, tissue structure destruction is limited to the mucosal layer, abnormal intestinal wall glandular structure, mild inflammatory cell infiltration | 2     |
| Focal, transmural ulcers and inflammation, mild to moderate inflammatory cell infiltration                                                                           | 3     |
| Large transmural ulcers and inflammation, moderate inflammatory cell infiltration                                                                                    | 4     |
| Large ulcers and inflammation, lesions infiltrate from mucosa to serous membrane, severe inflammatory cell infiltration                                              | 5     |

**Table S3: Primer sequences used for the real-time PCR analysis.**

| Gene name | Primer (5'-3')                                          | Temperature (°C) |
|-----------|---------------------------------------------------------|------------------|
| AMPK      | F: TCTGAGGGGCACCAAGAAAC<br>R: GTGGGTGTTGACGGAGAAGAG     | 60               |
| ULK1      | F: AAGTTCGAGTTCTCTCGCAAG<br>R: CGATGTTTTTCGTGCTTTAGTTCC | 60               |
| LYZ1      | F: GAGACCGAAGCACCGACTATG<br>R: CGGTTTTTGACATTGTGTTCGC   | 60               |
| DEFA1     | F: TGTAGAAAAGGAGGCTGCAATAG<br>R: AGAACAAAAGTCGTCCTGAGC  | 60               |
| CTSB      | F: TCCTTGATCCTTCTTTCTTGCC<br>R: ACAGTGCCACACAGCTTCTTC   | 60               |
| CTSD      | F: GCTTCCGGTCTTTGACAACCT<br>R: CACCAAGCATTAGTTCTCCTCC   | 60               |
| CTSL      | F: GGGCTTTGTGAACGTCCAATC<br>R: CTGGAACGACTTGTGTTTAGTGT  | 60               |
| DEFA5     | F: CAGAGCAGCTACTAAGCGACT<br>R: AAAAGGGGAGATTCGGACAGA    | 60               |
| CAMP      | F: ATCCCGTACCACAAGCTCG<br>R: GGATGTGTAGGTGCTTCACTG      | 60               |
| MTOR      | F: TCCCCGGAACGAGGAACTC<br>R: TTCGCTCCACAGCCCATTTTC      | 60               |
| LC3B      | F: GAAGGCACCCCATTTGGGTT<br>R: AATCTCTGCATCTTCGGCTGA     | 60               |
| GAPDH     | F: TGGATTTGGACGCATTGGTC<br>R: TTTGCACTGGTACGTGTTGAT     | 60               |
